# Supplementary material for: How Many Conformations of Enzymes Should Be Sampled for DFT/MM Calculations? A Case Study of Fluoroacetate Dehalogenase
Source: PubMed Central journal article supplement (PMC5000767; doi:10.3390/ijms17081372), 2016-08-20
Supplement: ijms-17-01372-s001.pdf [file ijms-17-01372-s001.pdf]

# Supplementary Materials: How Many Conformations of Enzymes Should Be Sampled for DFT/MM Calculations? A Case Study of Fluoroacetate Dehalogenase

Yanwei Li, Ruiming Zhang, Likai Du, Qingzhu Zhang and Wenxing Wang

**Table S1.** Twenty calculated energy barriers for systems FAcD-FAc-S, FAcD-FAc-B, FAcD-ClAc-S, and FAcD-ClAc-B. The unit is in kcal·mol<sup>-1</sup>.

| Snapshots/ns | FAcD-FAc-S | FAcD-FAc-B | FAcD-ClAc-S | FAcD-ClAc-B |
|--------------|------------|------------|-------------|-------------|
| 0.5          | 26.6       | 14.3       | 7.1         | 15.4        |
| 1            | 27.2       | 18.6       | 7.6         | 17.8        |
| 1.5          | 27.0       | 15.1       | 10.3        | 20.4        |
| 2            | 30.9       | 20.2       | 10.0        | 17.6        |
| 2.5          | 20.4       | 10.7       | 11.5        | 19.2        |
| 3            | 27.4       | 20.5       | 10.6        | 17.4        |
| 3.5          | 25.5       | 16.0       | 10.9        | 19.8        |
| 4            | 18.8       | 9.7        | 6.9         | 13.6        |
| 4.5          | 22.0       | 15.5       | 9.9         | 13.0        |
| 5            | 30.2       | 17.8       | 6.9         | 18.5        |
| 5.5          | 26.7       | 21.9       | 13.2        | 23.3        |
| 6            | 20.6       | 19.3       | 10.7        | 14.8        |
| 6.5          | 18.7       | 15.0       | 13.9        | 23.6        |
| 7            | 29.6       | 16.5       | 7.6         | 14.6        |
| 7.5          | 30.2       | 15.3       | 12.8        | 23.4        |
| 8            | 27.3       | 16.9       | 7.0         | 18.0        |
| 8.5          | 24.1       | 16.5       | 6.9         | 19.4        |
| 9            | 29.9       | 16.2       | 11.0        | 21.0        |
| 9.5          | 31.1       | 21.5       | 8.0         | 17.2        |
| 10           | 28.1       | 20.3       | 13.2        | 20.0        |
